# Supplementary material
Source: PubMed Central journal article supplement (PMC2944421)
Supplement: 00746.2009_1.pdf [file 00746.2009_1.pdf]

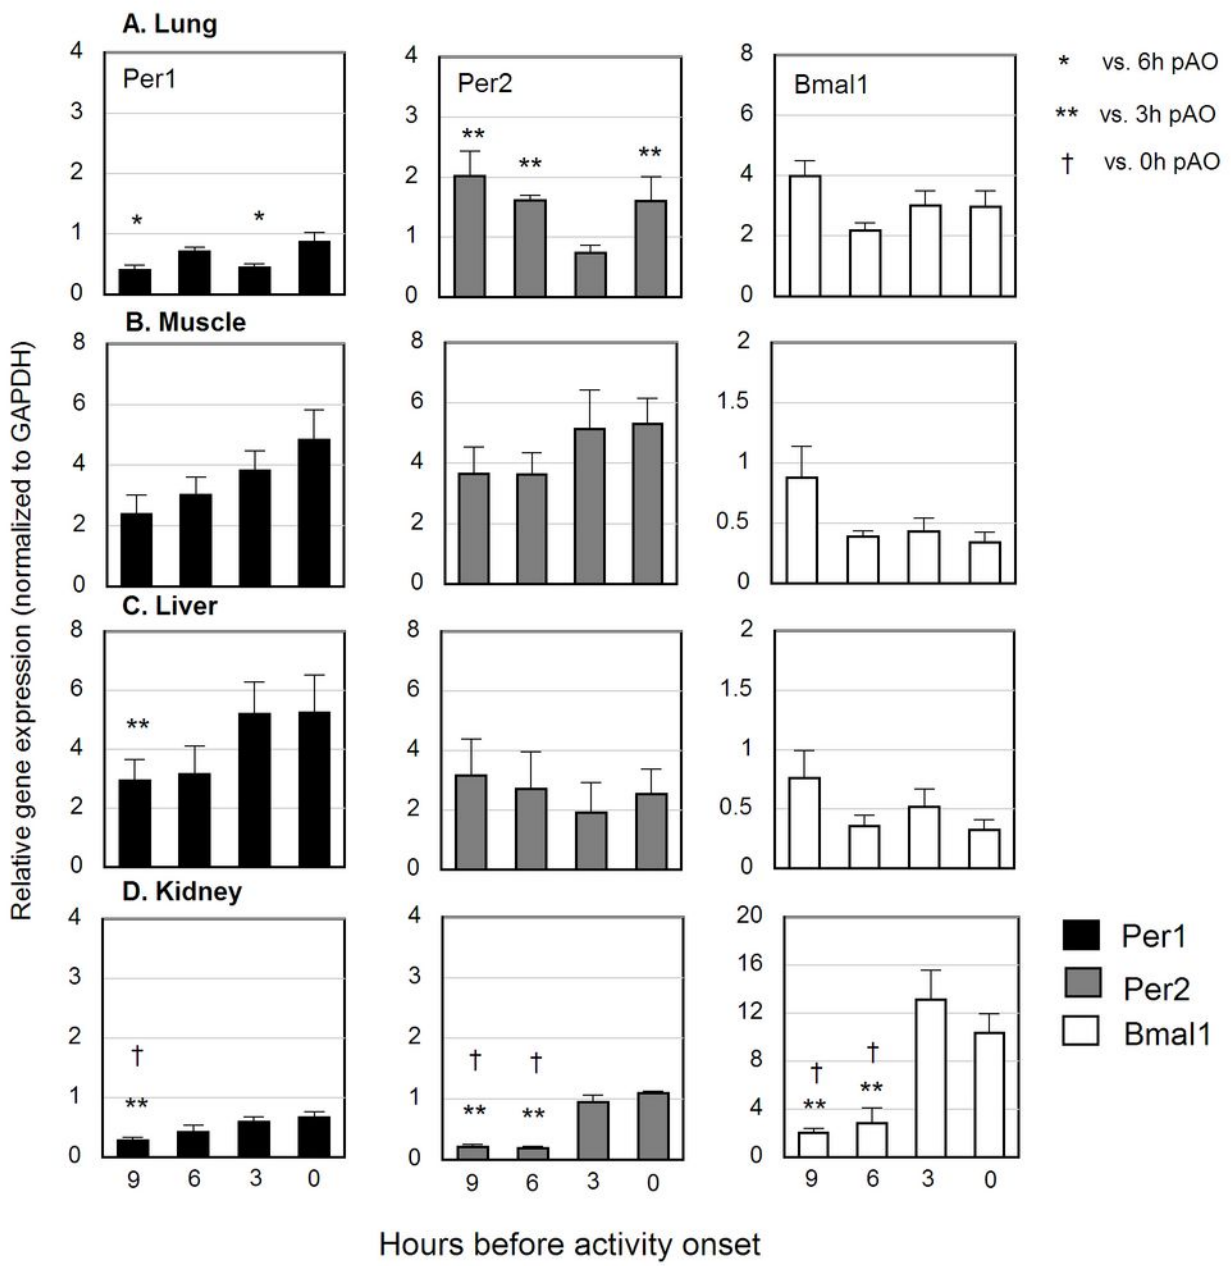

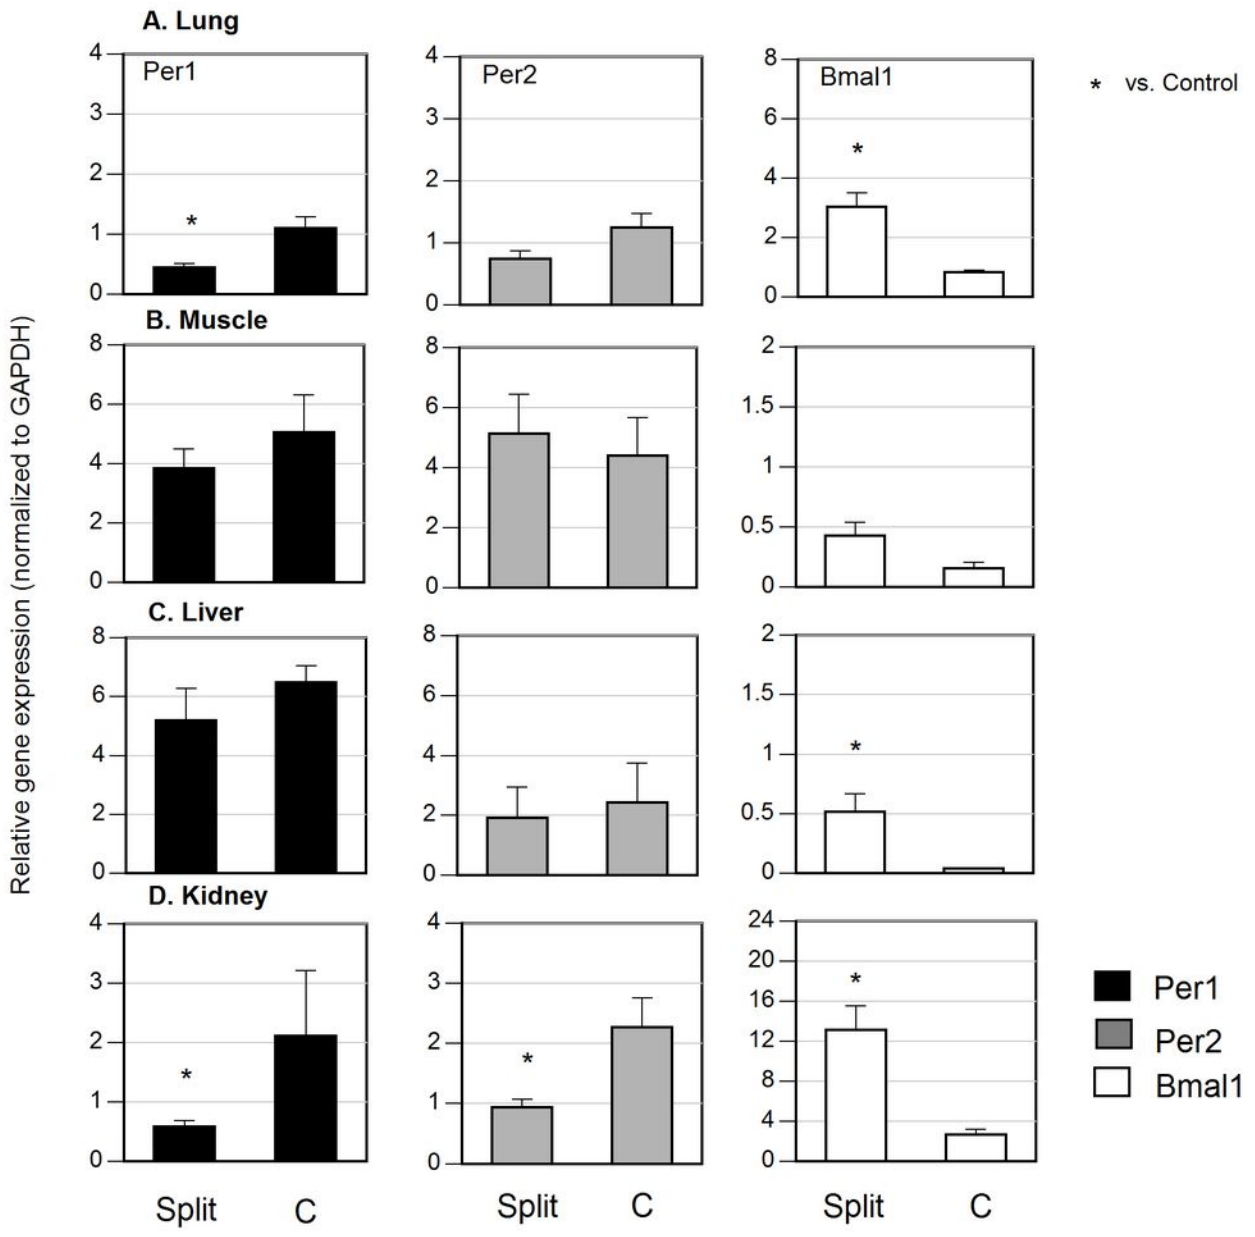

A. Relationship between Per1 asymmetry in lung and  $\psi_{ME}$  in experimental data

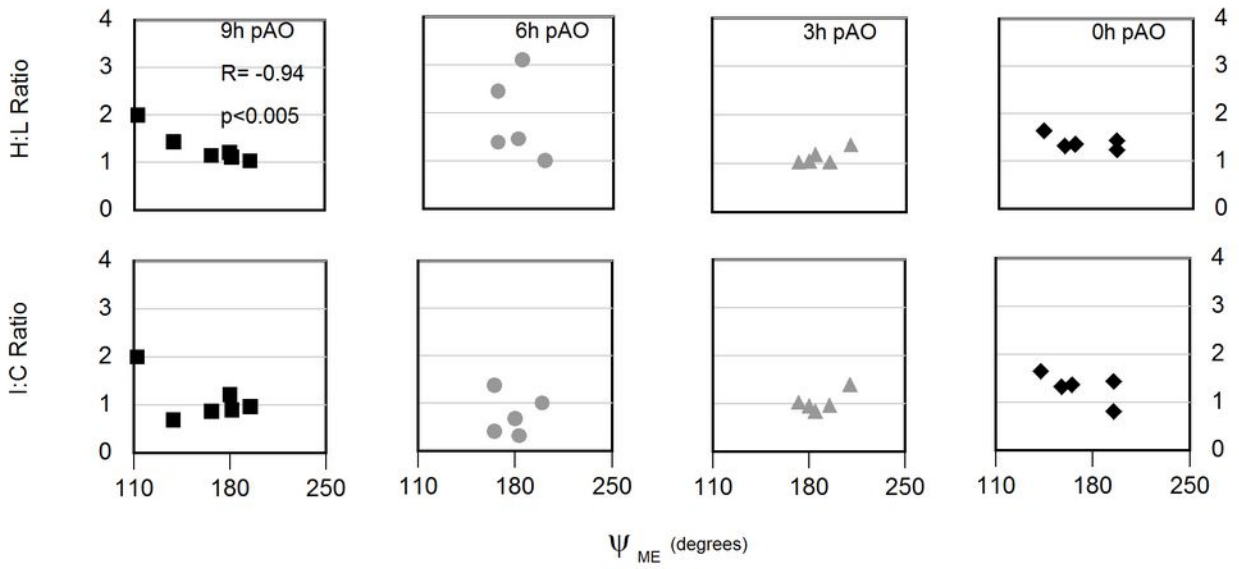

B. Relationship between Per2 asymmetry in kidney and  $\psi_{ME}$  in experimental data

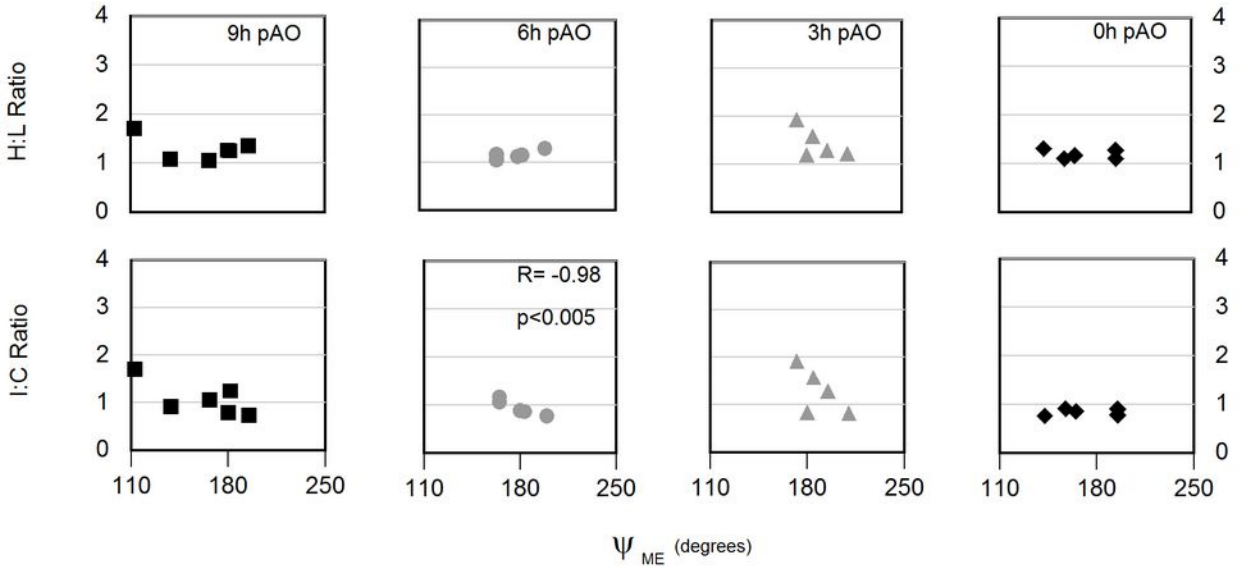

1 Supplement Figure 1. Relative expression (mean $\pm$ SEM) of *haPer1* (black bars), *haPer2*  
2 (*grey bars*) and *haBmal1* (*white bars*) in the lung (A), muscle (B), liver (C) and kidney  
3 (D). In hamsters that split in LL, messenger RNA values from the left and right side of  
4 each peripheral organ were averaged for each individual before group means were  
5 calculated for each phase (pAO). Gene expression was assessed by qrtPCR and  
6 normalized to GAPDH (*see methods*). Statistical significance: \* p<0.05 vs. unsplit  
7 control, \*\* p<0.05 vs. 3h pAO, † p<0.05 vs. 0h pAO.

8

9 Supplement Figure 2. Relative gene expression (mean $\pm$ SEM) averaged for the left and  
10 right organs from split and unsplit animals killed at 3h pAO. Levels of *haPer1* (black  
11 bars), *haPer2* (*grey bars*) and *haBmal1* (*white bars*) mRNA in the lung (A), muscle (B),  
12 liver (C) and kidney (D) are illustrated. \* p<0.05 vs. unsplit control.

13

14 Supplement Figure 3. H:L (*top row*) and I:C (*bottom row*) ratios of (A) relative *haPer1*  
15 expression in lung and (B) relative *haPer2* expression in kidney plotted as a function of  
16  $\Psi_{ME}$  Spearman's correlation (R) and p values are indicated where statistical significance  
17 was observed.

18
